# Supplementary material
Source: Springer Nature journal article supplement (https://www.springermedizin.de/resource/supplementary/13075_2013_4086_MOESM3_ESM.pdf/9695992)

$\Delta\text{SHS}<1$  $\Delta\text{SHS}\geq 1$ Adiponectin ( $\mu\text{g/mL}$ )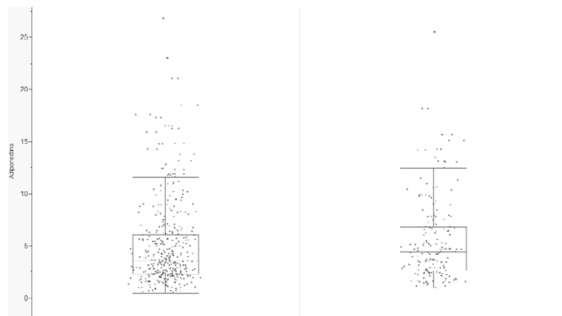Leptin ( $\text{ng/L}$ )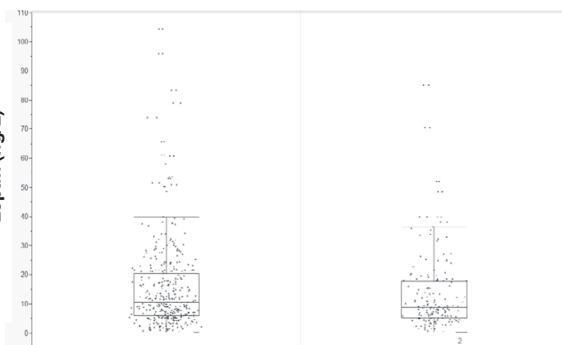Visfatin ( $\text{ng/L}$ )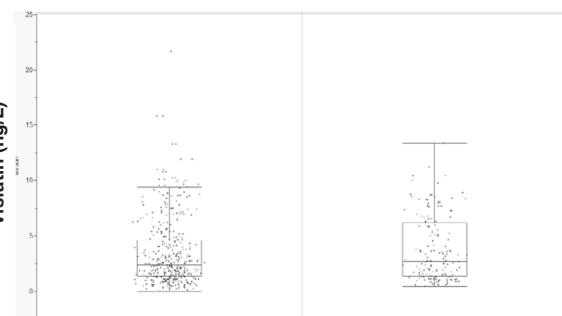 $\Delta\text{SHS}<5$  $\Delta\text{SHS}\geq 5$ Adiponectin ( $\mu\text{g/mL}$ )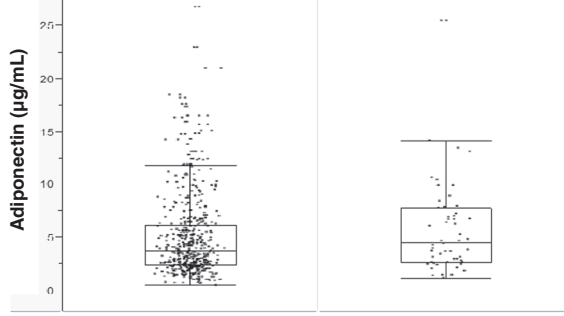Leptin ( $\text{ng/L}$ )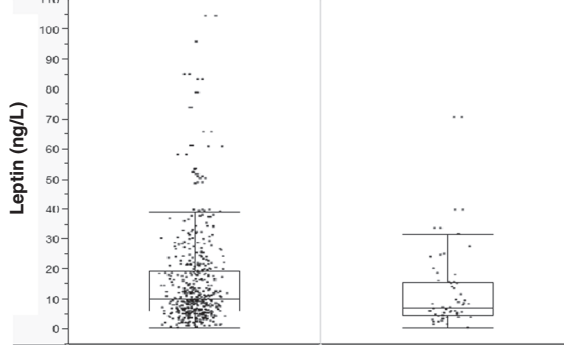Visfatin ( $\text{ng/L}$ )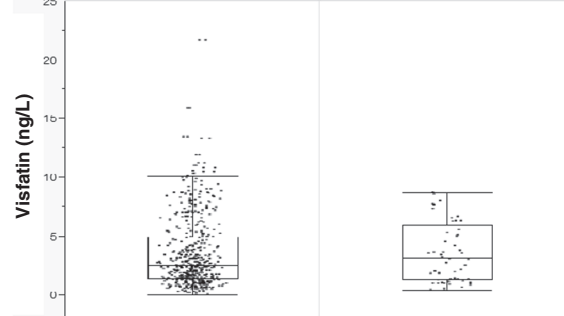

Supplement: MOESM3 [file 9695992]
